# Supplementary material for: Medicinal plants used to treat the most frequent diseases encountered in Ambalabe rural community, Eastern Madagascar
Source: PubMed Central journal article supplement (PMC4570514; doi:10.1186/s13002-015-0050-2), 2015-09-15
Supplement: 13002_2015_50_MOESM1_ESM.pdf [file 13002_2015_50_MOESM1_ESM.pdf]

## Additional file 1

### Guide d'entretien utilisé

#### Fiche sur l'informateur

N° informateur :

1. Date :
2. Village :
3. Nom :
4. Age :
5. Genre : a) masculin  b) féminin
6. Situation matrimoniale : a) marié(e)  b) divorcé(e)  c) célibataire  d) veuf(ve)
7. Nombre d'enfants :
8. Nombre dans la famille :
9. Ethnie : 1. Betsimisaraka  2. Sihanaka  3. Merina  4. Autre
10. Niveau d'éducation :
11. Profession/Occupation : a) cultivateur  b) éleveur  c) Autre

#### Questionnaires

1. Quand vous êtes malade, où est-ce que vous allez ? Pourquoi ?
2. En cas de maladie, est-ce que vous utilisez des plantes ?
3. Quelles sont les maladies les plus fréquentes à Ambalabe ?
4. Quelles sont les plantes que vous utilisez pour soigner ? Comment les préparer et les administrer ?
5. Quelles sont les raisons pour le choix des plantes que vous utilisez ? Est-ce leur efficacité ou leur disponibilité ?
6. Où est-ce que vous prélevez ces plantes ? Quelles sont les parties de plante que vous prélevez et comment les prélever ?
7. Quelle est la quantité que vous prélevez ? Est-ce qu'il y a des moments particuliers pour le prélèvement ?
8. Comment sont ces plantes actuellement ? Est-ce qu'elles sont toujours abondantes ou difficile à trouver ?
9. Comment avez-vous appris l'utilisation des plantes que vous avez citées ?
10. Est-ce que vous avez des suggestions pour assurer l'utilisation à long terme de ces plantes, ou pour assurer leur conservation ?
